# Supplementary material for: Lactide oligomers modified with linear polyethyleneimine for antibacterial coatings
Source: Royal Society of Chemistry journal article supplement (doi:10.1039/d4py00605d), 2024-01-01
Supplement: d4py00605d1.pdf [file d4py00605d1.pdf]

## Lactide oligomers modified with linear poly(ethyleneimine) for antibacterial coatings

Anna Iuliano,<sup>\*a</sup> Maksymilian Kukuć,<sup>a</sup> Julita Pachla,<sup>a</sup> Dominik Jańczewski,<sup>a</sup> Jolanta Mierzejewska,<sup>a</sup> and Karolina Drężek<sup>a</sup>

<sup>a</sup> Faculty of Chemistry, Warsaw University of Technology, Noakowskiego 3, 00-664, Warsaw, Poland

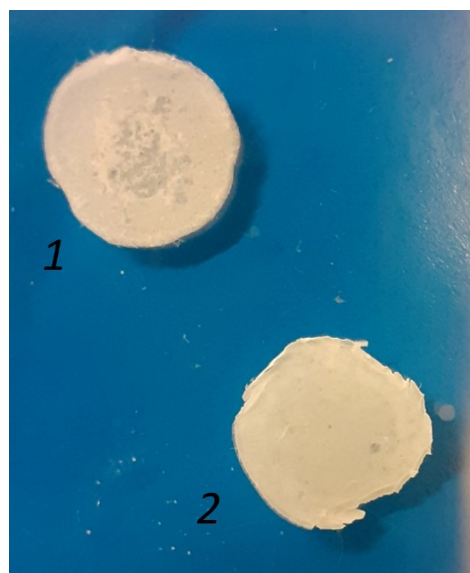

Figure S1. Polymer blends of PEI<sub>58</sub>-PLA<sub>25</sub>/PLA<sub>15</sub>% (1) and PEI<sub>58</sub>-PLA<sub>25</sub>-BuBr/PLA<sub>15</sub>% (2).

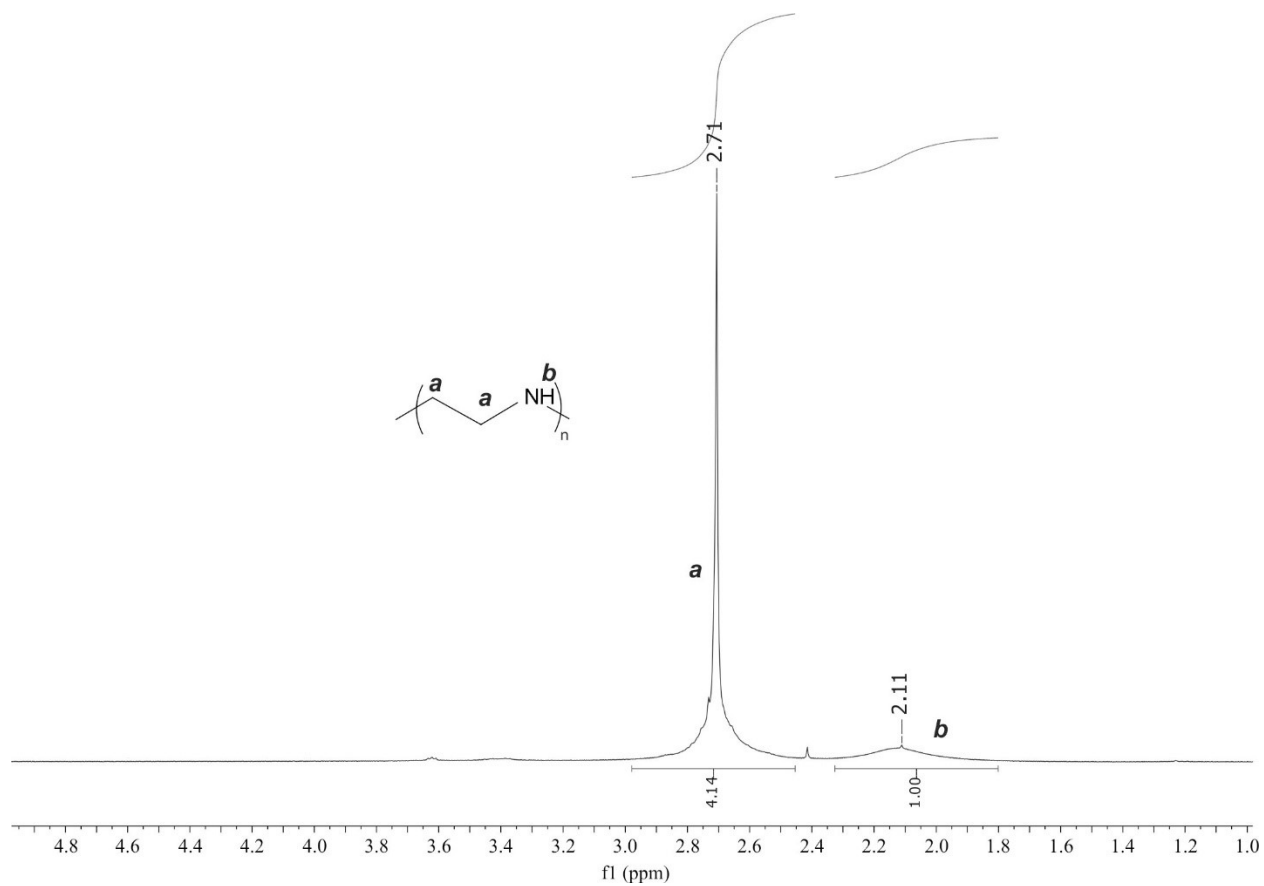

Figure S2.  $^1\text{H}$  NMR spectrum of L-PEI,  $M_n = 4000 \text{ g mol}^{-1}$  (500 MHz,  $\text{CDCl}_3$ ).

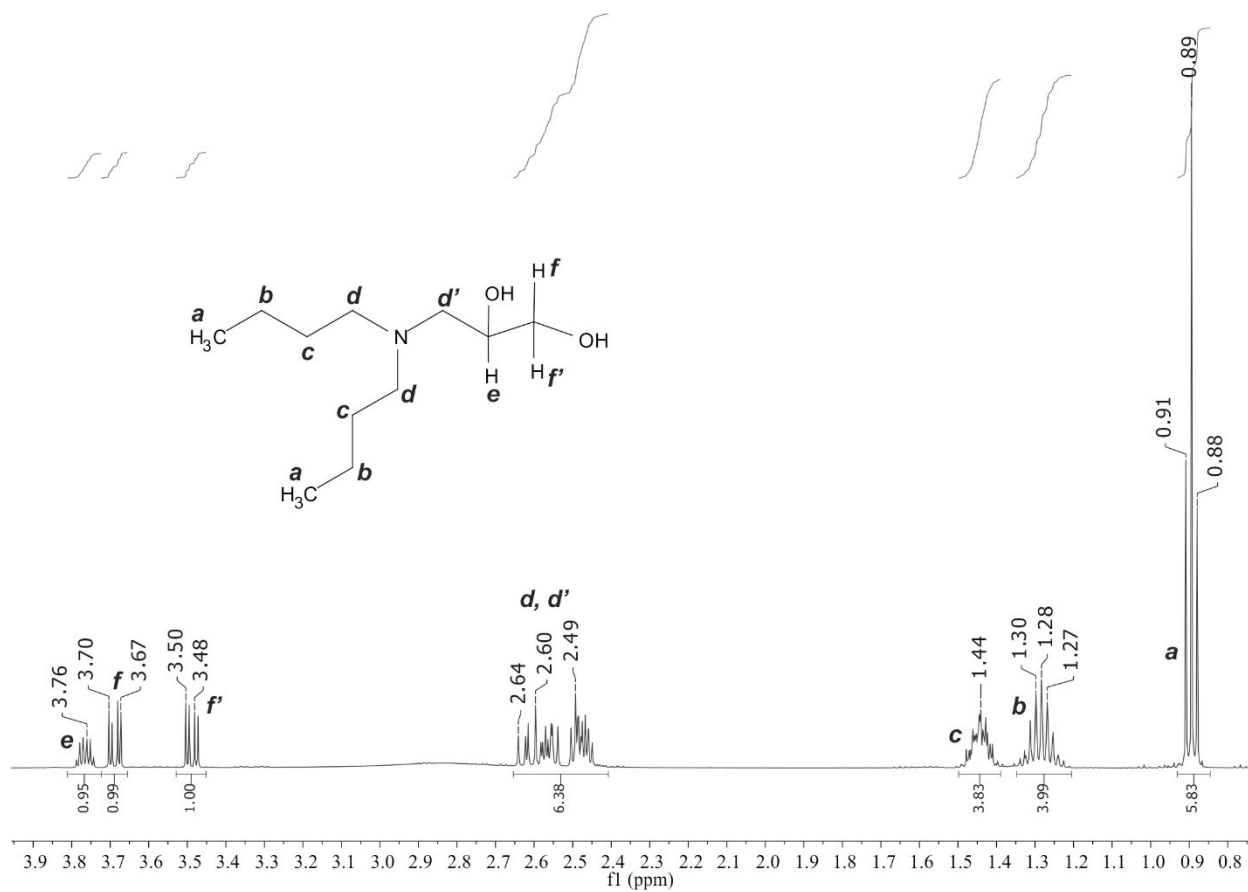

Figure S3. <sup>1</sup>H NMR spectrum of 3-(dibutylamino)propane-1,2-diol (500 MHz, CDCl<sub>3</sub>).

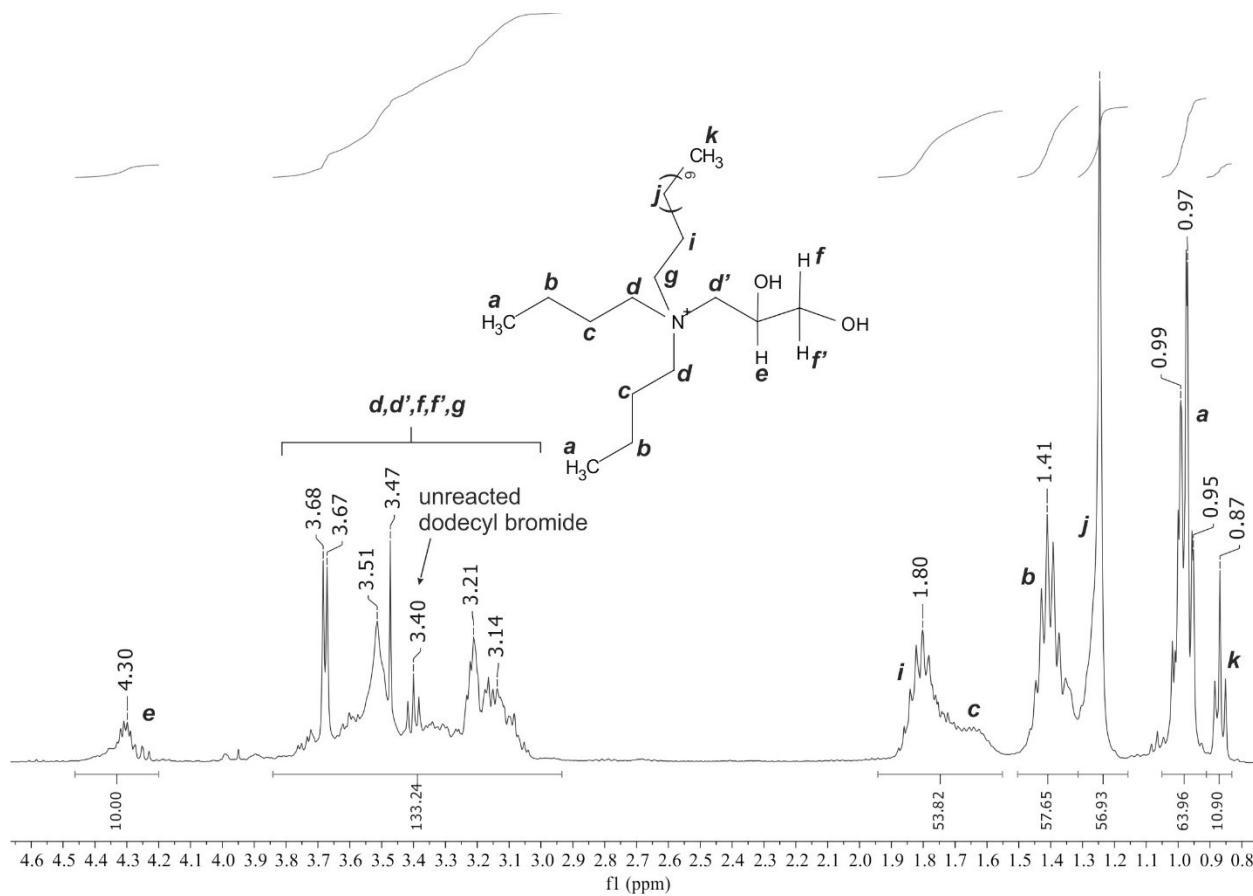

Figure S4. <sup>1</sup>H NMR spectrum of 3-(dibutylamino)-N-dodecylpropane-1,2-diol (400 MHz, CDCl<sub>3</sub>).

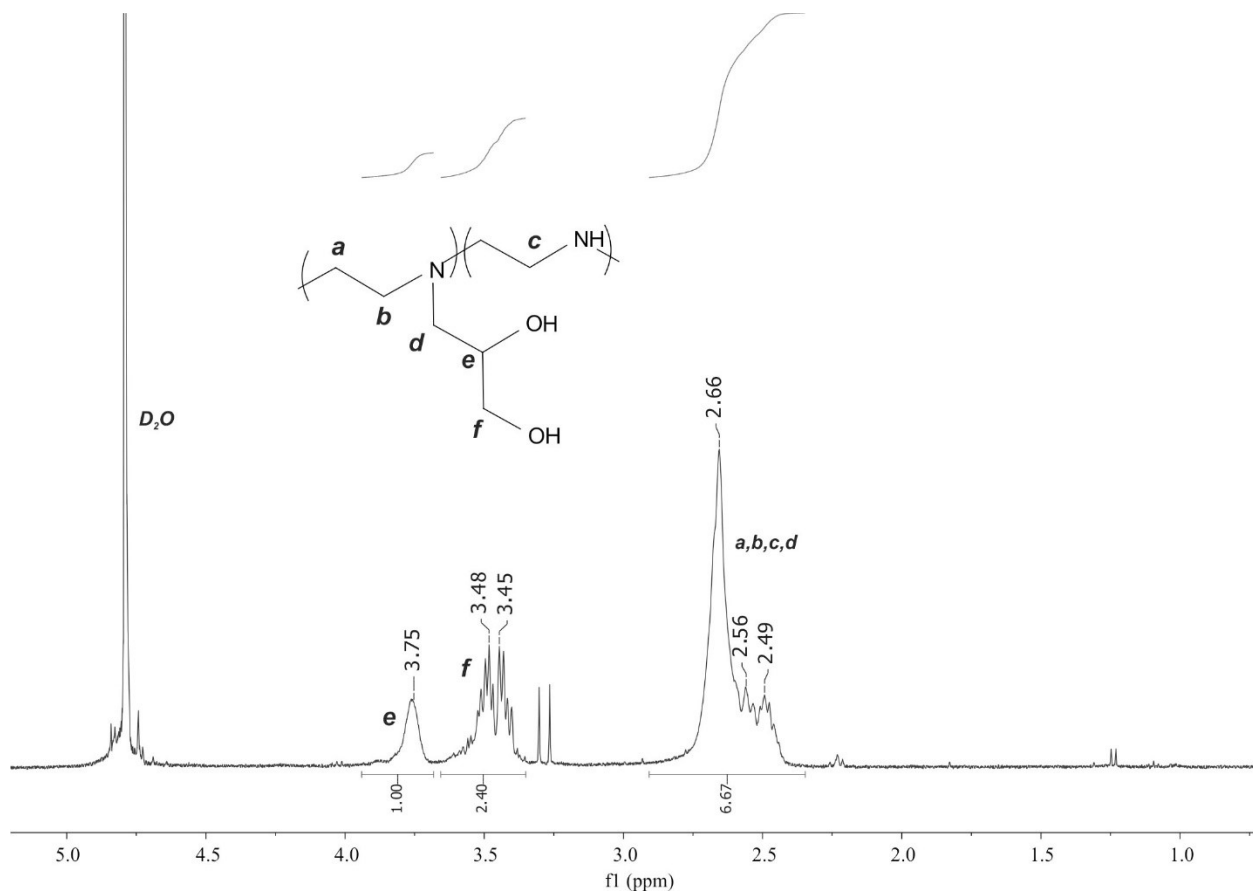

Figure S5.  $^1\text{H}$  NMR spectrum of reaction product of linear PEI ( $M_n=2500 \text{ g}\cdot\text{mol}^{-1}$ ) with glycidol in the molar ratio of L-PEI:GLY=1:29 (400 MHz,  $\text{D}_2\text{O}$ ).

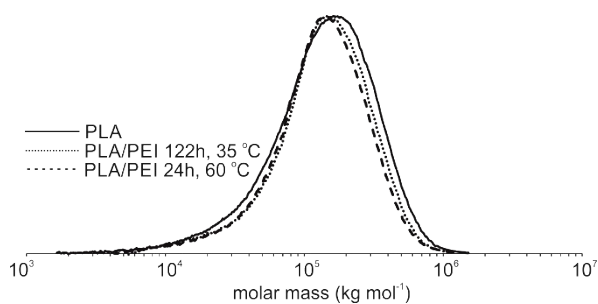

Figure S6. GPC chromatogram of commercial PLA and the reaction mixture of PLA with L-PEI.

Table S1. GPC analysis of commercial PLA and the reaction mixture of PLA with L-PEI.

|                       | Mn<br>(kg·mol <sup>-1</sup> ) | DI   |
|-----------------------|-------------------------------|------|
| PLA                   | 79.7                          | 2.22 |
| PLA/L-PEI 122h, 35 °C | 83.7                          | 2.02 |
| PLA/L-PEI 24h, 60 °C  | 84.8                          | 1.91 |

Table S2. Elemental analysis of PEI<sub>58</sub>-PLA<sub>25</sub> and reaction product with alkyl bromide.

|                                             | C [%]      | H [%]       | N [%]     | C/N   |
|---------------------------------------------|------------|-------------|-----------|-------|
| PEI <sub>58</sub> -PLA <sub>25</sub>        | 41.39±0.23 | 6.072±0.178 | 1.04±0.11 | 46.43 |
| PEI <sub>58</sub> -PLA <sub>25</sub> -BuBr  | 41.11±0.30 | 6.018±0.055 | 0.92±0.02 | 52.13 |
| PEI <sub>58</sub> -PLA <sub>25</sub> -OctBr | 41.26±0.03 | 6.125±0.046 | 0.92±0.05 | 52.03 |
| PEI <sub>58</sub> -PLA <sub>25</sub> -DodBr | 41.90±0.14 | 6.03±0.074  | 1.04±0.07 | 47.00 |
